# Supplementary material for: Objective sampling design in a highly heterogeneous landscape - characterizing environmental determinants of malaria vector distribution in French Guiana, in the Amazonian region
Source: PubMed Central journal article supplement (PMC4219608; doi:10.1186/1472-6785-13-45), 2013-12-01
Supplement: 1472-6785-13-45-S1.pdf [file 1472-6785-13-45-S1.pdf]

## Additional file 1/1

Objective sampling design in a highly heterogeneous landscape - characterizing environmental determinants of malaria vector distribution in French Guiana, in the Amazonian region

---

**Algorithm 1** : Commented algorithm, in pseudo-code, used to obtain the land cover/use map from SPOT5 images

---

```
1: # Notations
2: #  $C_i$ : classe  $i$ 
3: #  $p_k$ : patch  $k$  (patch = set of contiguous pixels belonging to the same class)
4: #  $|p_k|$ : number of pixels of patch  $k$ 
5: #  $|p_k \cap p_l|$ : overlap, in number of pixels, of patches  $k$  and  $l$ 
6: #  $\text{class}(p_k)$ : returns the class to which the patch  $p_k$  belongs
7: #  $\text{class}(p_k) \leftarrow C_i$ : the class of the patch  $p_k$  is set to  $C_i$ 
8: #  $p_k^L$ :  $k^{\text{th}}$  patch associated with layer  $L$ 
9: #  $P_{C_i} = \{p_k | \text{class}(p_k) = C_i\}$ : set of patches associated with the class  $C_i$ 
10:
11: for  $i = 1$  to 5 do
12:   Perform a  $k$ -means clustering of the pixels of the image  $i$  (four bands), with  $k = 50$ 
13:
14:   # Create initial land cover/use map,  $Map_i$ , with pre-labelled classes that include some land cover
   type confusions (that can not be removed at this step) (expert-based):
15:   Merge initial clusters to define pre-labelled classes (with confusion):  $C_1 = \text{Cloud OR Bare soil OR}$ 
    $\text{Building OR Unknown}$ ;  $C_2 = \text{Could shadow OR Water OR Unknown}$ ;  $C_3 = \text{Bare soil OR Building OR}$ 
    $\text{Unknown}$ ;  $C_4 = \text{Water}$ ;  $C_5 = \text{Forest}$ ;  $C_6 = \text{Secondary growth OR Degraded forest OR Forest}$ ;  $C_7 =$ 
    $\text{Vegetation 1 (anthropogenic)}$ ;  $C_8 = \text{Vegetation 2 (anthropogenic)}$ ;  $C_9 = \text{Vegetation 3 (anthropogenic)}$ ;
    $C_{10} = \text{Vegetation 4 (anthropogenic)}$ ;  $C_{11} = \text{Vegetation 5 (anthropogenic)}$ 
16:
17:   # Detect clouds and cloud shadows:
18:   Create layer  $L$  with  $P_{C_1}$  and layer  $L'$  with  $P_{C_2}$ 
19:   Find translation  $t$  that maximizes  $\sum_{(p_k^L, p_l^{L'}) \in L \times L'} (t(p_l^{L'}) \cap p_k^L)$ 
20:   for all  $(p_k^L, p_l^{L'}) \in L \times L'$  do
21:     if  $\frac{|p_k^L \cap t(p_l^{L'})|}{|p_k^L|} > \alpha$  then #  $\alpha$  is found with a trial-and-error approach
22:        $\text{class}(p_k^L) \leftarrow C_{11}$  #  $C_{11} = \text{Cloud}$ 
23:        $\text{class}(p_l^{L'}) \leftarrow C_{21}$  #  $C_{21} = \text{Cloud shadow}$ 
24:     else
25:        $\text{class}(p_k^L) \leftarrow C_3$  #  $C_3 = \text{Bare soil OR Building OR Unknown}$ 
26:        $\text{class}(p_l^{L'}) \leftarrow C_{22}$  #  $C_{22} = \text{Water OR Unknown}$ 
27:     end if
28:   end for
29:   Update  $Map_i$ 
```

---

---

```

30: # Reclass small isolated patches labeled  $C_3 = \text{Bare soil OR Building OR Unknown}$  that are far from
    water(1) as  $C_{32} = \text{Unknown}$ :
31: Create layer  $L$  with  $P_{C_3}$  and layer  $L'$  with  $P_{C_3 \cup C_4}$ 
32: Create layer  $L'_{\text{closed}}$  by applying to  $L'$  a closing morphological filter with a 5-pixel radius disk as
    structuring element
33: Create layer  $L'_{\text{closed filtered}}$  by removing small patches ( $< 0.1$  ha) from  $L'_{\text{closed}}$ 
34: for all  $(p_k^L, p_l^{L'_{\text{closed filtered}}}) \in L \times L'_{\text{closed filtered}}$  do
35:     if  $|p_k^L \cap p_l^{L'_{\text{closed filtered}}}| > 0$  then # In fact, in this case,  $|p_k^L \cap p_l^{L'_{\text{closed filtered}}}| = |p_k^L|$ 
36:          $\text{class}(p_k^L) \leftarrow C_{31}$  #  $C_{31} = \text{Bare soil OR Building}$ 
37:     else
38:          $\text{class}(p_k^L) \leftarrow C_{32}$  #  $C_{32} = \text{Unknown}$ 
39:     end if
40: end for
41: Update  $Map_i$ 
42:
43: # Identify patches of water among patches of  $C_{22} = \text{Water OR Unknown}$ (2)
44: Create layer  $L$  with  $P_{C_{31} \cup C_4}$  and layer  $L'$  with  $P_{C_{22}}$ 
45: for all  $(p_k^L, p_l^{L'}) \in L \times L'$  do
46:     if  $p_k^L$  and  $p_l^{L'}$  adjacent then
47:          $\text{class}(p_l^{L'}) \leftarrow C_4$  #  $C_4 = \text{Water}$ 
48:     else
49:          $\text{class}(p_l^{L'}) \leftarrow C_{32}$  #  $C_{32} = \text{Unknown}$ 
50:     end if
51: end for
52: Update  $Map_i$ 
53:
54: # Identify patches of dense forest among patches of class  $C_6 = \text{Secondary growth OR Degraded forest}$ 
    OR Forest(3)
55: Create layers  $L$  with  $P_{C_7 \cup C_8 \cup C_9 \cup C_{10} \cup C_{11}}$  and layer  $L'$  with  $P_{C_6}$ 
56: for all  $(p_k^L, p_l^{L'}) \in L \times L'$  do
57:     if  $p_k^L$  and  $p_l^{L'}$  adjacent then
58:          $\text{class}(p_l^{L'}) \leftarrow C_{61}$  #  $C_{61} = \text{Secondary growth OR Degraded forest}$ 
59:     else
60:          $\text{class}(p_l^{L'}) \leftarrow C_5$  #  $C_5 = \text{Forest}$ 
61:     end if
62: end for
63: Update  $Map_i$ 
64:
65: # Finalize  $Map_i$  (expert-based):
66: Correct errors and label patches of  $C_{32} = \text{Unknown}$  (with classes  $C_5 = \text{Forest}$  and  $C_{61} = \text{Secondary}$ 
    growth OR Degraded forest essentially)
67: end for

```

---

---

---

68: # Create the final land cover/use map, *Map*, by patching the maps *Map<sub>i</sub>*:  
69: *Map* = patch(*Map<sub>1</sub>*, *Map<sub>2</sub>*, ..., *Map<sub>5</sub>*)  
70:  
71: # Finalize class interpretation and labeling and evaluate (expert knowledge, field works and BD-Ortho<sup>®</sup> aerial photographs):  
72: Label classes as following: *C<sub>11</sub>* = *No data (clouds)*; *C<sub>21</sub>* = *No data (cloud shadows)*; *C<sub>31</sub>* = *Bare soil OR buildings* ; *C<sub>4</sub>* = *Water*; *C<sub>5</sub>* = *Dense forest*; *C<sub>61</sub>* = *Secondary OR Degraded forest* ; *C<sub>7</sub>* = *Monospecific and homogeneous vegetation*; *C<sub>8</sub>* = *Dense low vegetation with shrubs*; *C<sub>9</sub>* = *Dense low vegetation*; *C<sub>10</sub>* = *Scattered herbaceous vegetation*; *C<sub>11</sub>* = *Dry savannah*

---

(1) Human settlements are often nearby rivers in this amazonian region. Consequently, patches of *C<sub>3</sub>* = *Bare soil OR Building OR Unknown* nearby water are likely to correspond to bare soil or buildings. Small isolated patches of *C<sub>3</sub>* = *Bare soil OR Building OR Unknown* far from water often correspond to emergent trees with particular light colors.

(2) Patches initially considered as shadows and adjacent to water bodies are likely to correspond to shady and/or shallow water (river banks). Moreover, gold mining sites are characterized by patches of water, bare soil and patches initially considered as shadows that, in fact, correspond to shady and/or shallow water too.

(3) Patches of *C<sub>6</sub>* = *Secondary growth OR Degraded forest OR Forest* that are adjacent to patches of anthropogenic vegetation classes are likely to correspond to secondary growth or degraded forest and not to dense "primary" forest.
